# Supplementary material for: Holocene carbon dynamics at the forest–steppe ecotone of southern Siberia
Source: PubMed Central journal article supplement (PMC6849524; doi:10.1111/gcb.13583), 2016-12-28

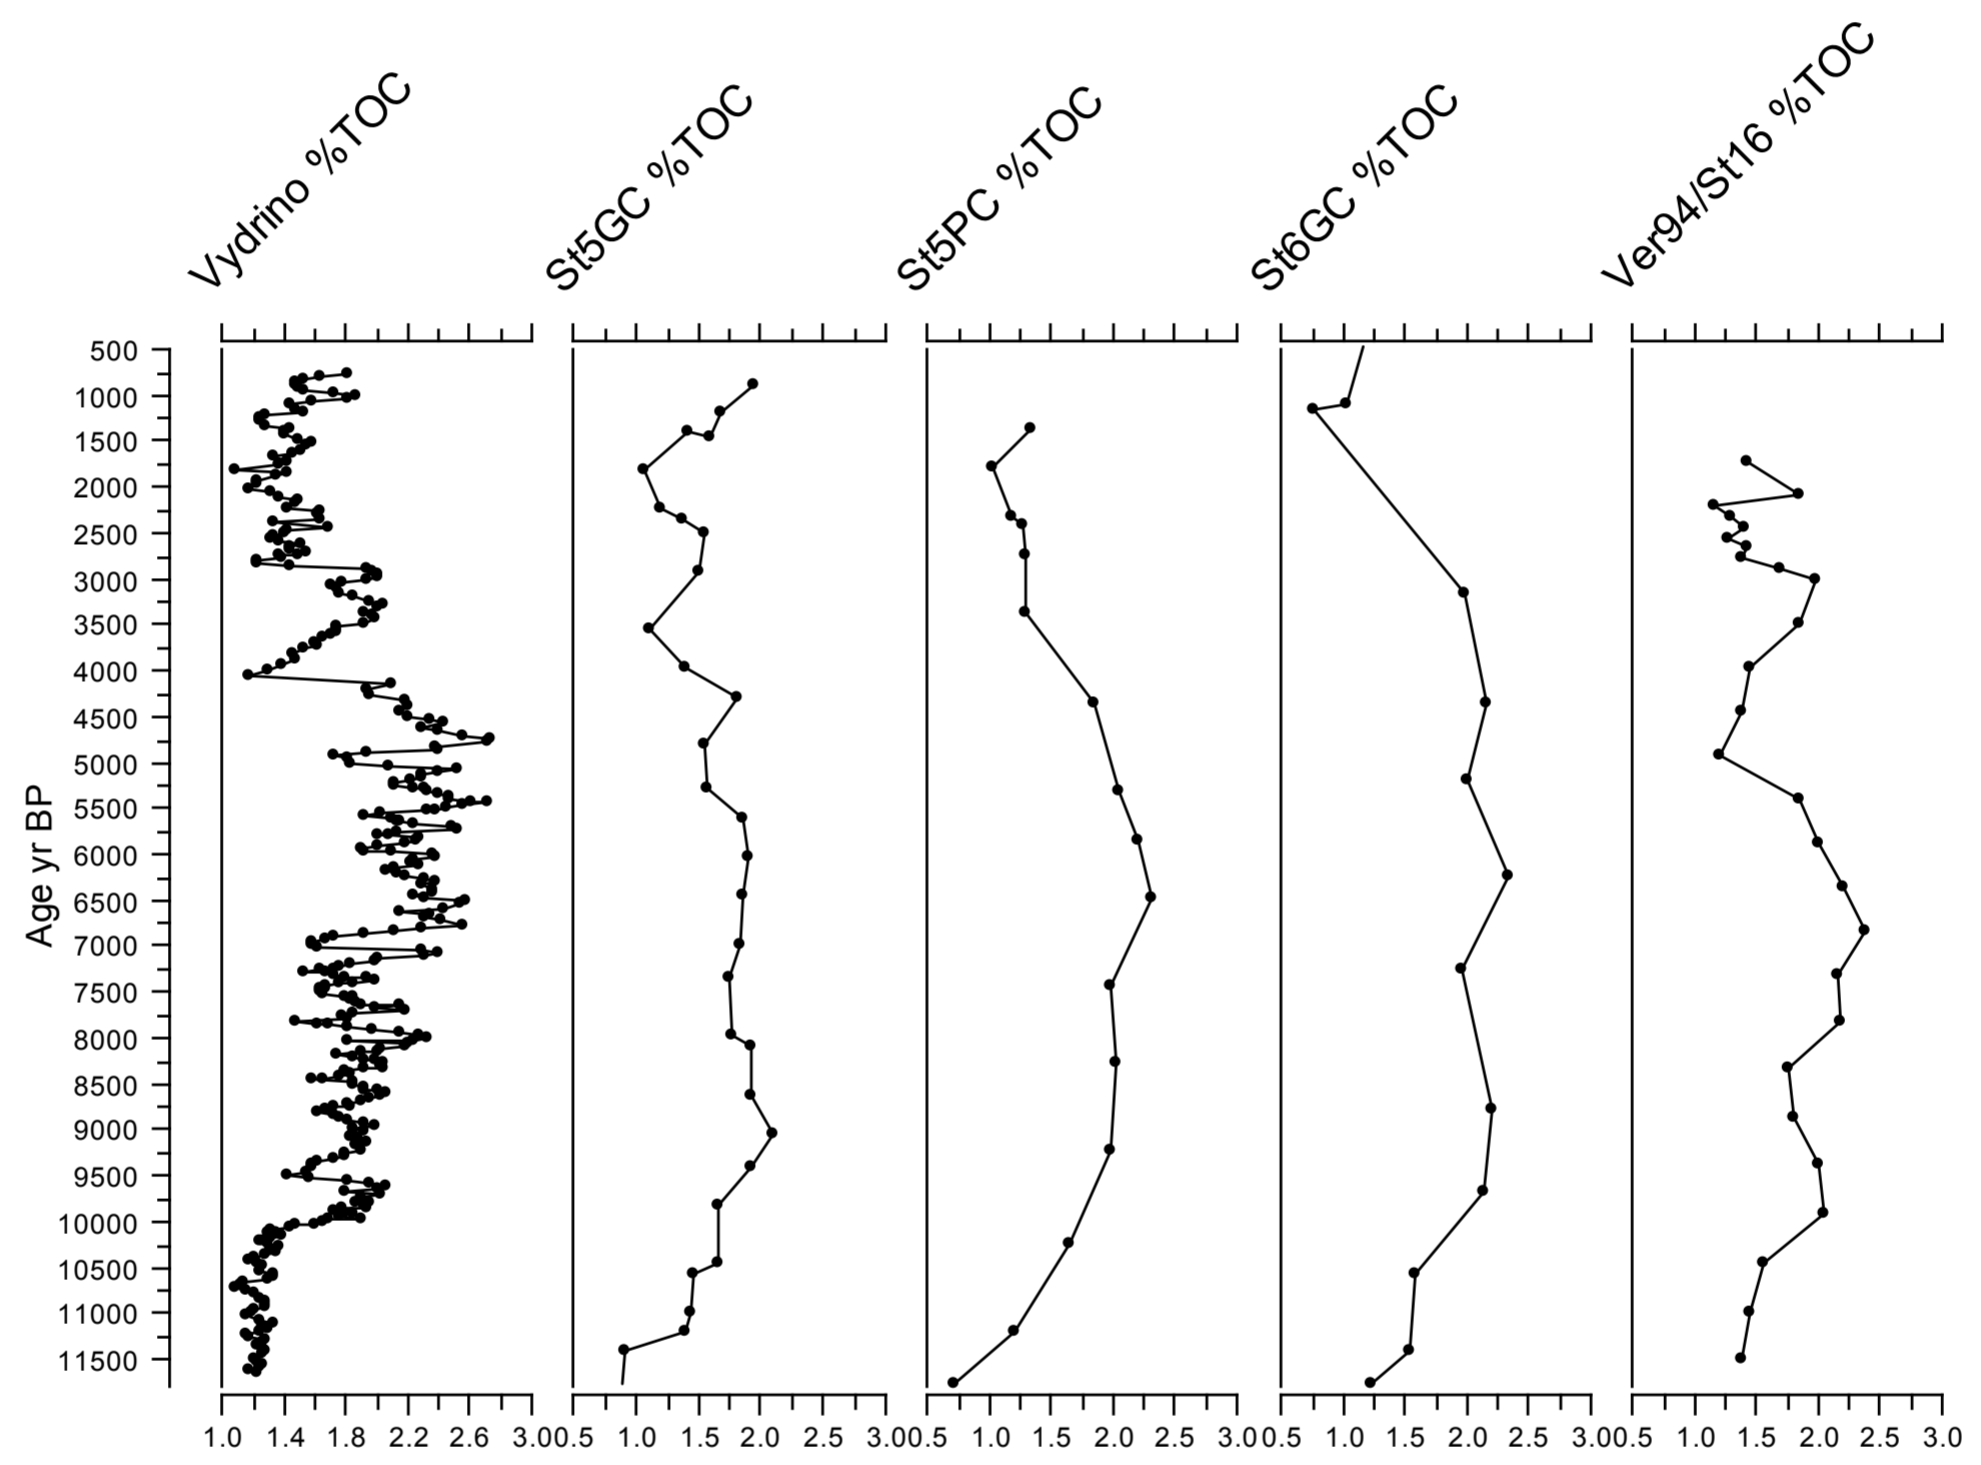

Supplement: GCB-23-1942-s004.pdf [file GCB-23-1942-s004.pdf]
